# Supplementary material for: Superior lithium storage in a 3D macroporous graphene framework/SnO2 nanocomposite
Source: Royal Society of Chemistry journal article supplement (doi:10.1039/c4nr01493f), 2014-01-01
Supplement: c4nr01493f1.pdf [file c4nr01493f1.pdf]

## Supporting Information

### Superior Lithium Storage in 3D Macroporous Graphene Frameworks/SnO<sub>2</sub> Nanocomposite

*Xiaowu Liu, Jianxiu Cheng, Weihan Li, Xiongwu Zhong, Zhenzhong Yang,*

*Lin Gu, Yan Yu.\**

[\*] Xiaowu Liu, Jianxiu Cheng, Weihan Li, *Xiongwu Zhong*, Prof. Yan Yu

CAS Key Laboratory of Materials for Energy Conversion, Department of Materials Science  
and Engineering, University of Science and Technology of China, Anhui Hefei 230026, P. R.  
China

E-mail: [yanyumse@ustc.edu.cn](mailto:yanyumse@ustc.edu.cn)

Zhenzhong Yang, Prof. Lin Gu

Beijing National Laboratory for Condensed Matter Physics, The Institute of Physics, Chinese  
Academy of Sciences, Beijing 100190, P. R. China

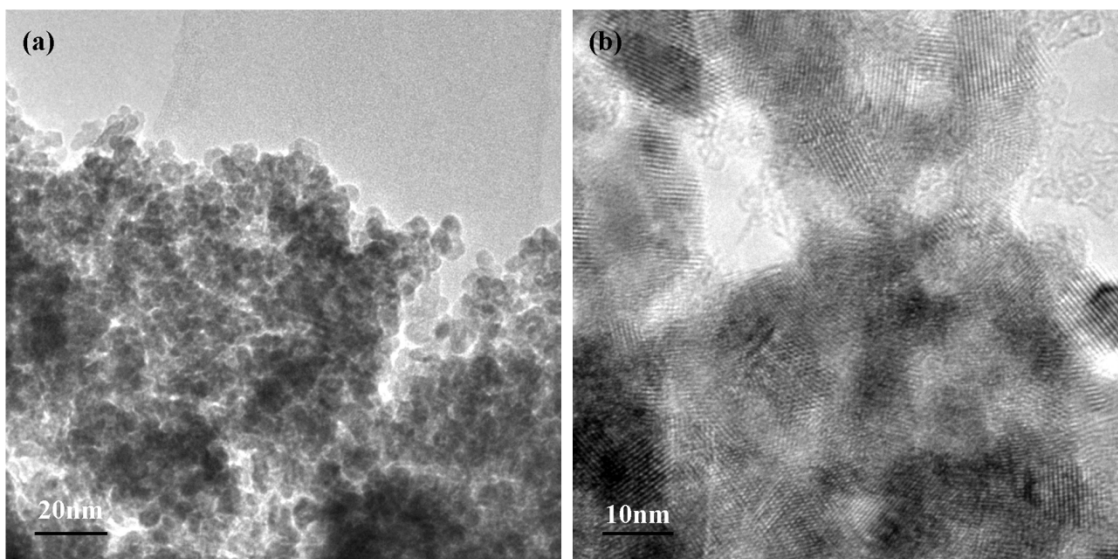

**Fig. S1** TEM (a) and HRTEM (b) images of SnO<sub>2</sub> nanoparticle, respectively

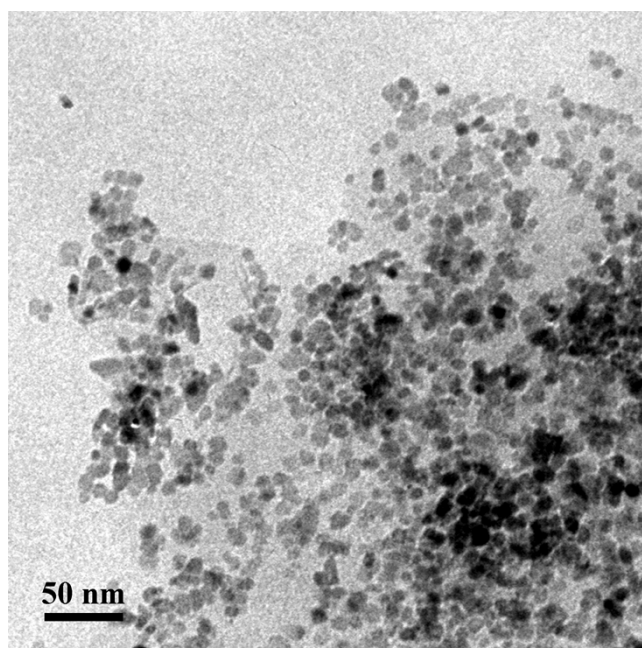

**Fig. S2** TEM image of SnO<sub>2</sub>/RGO nanocomposite.

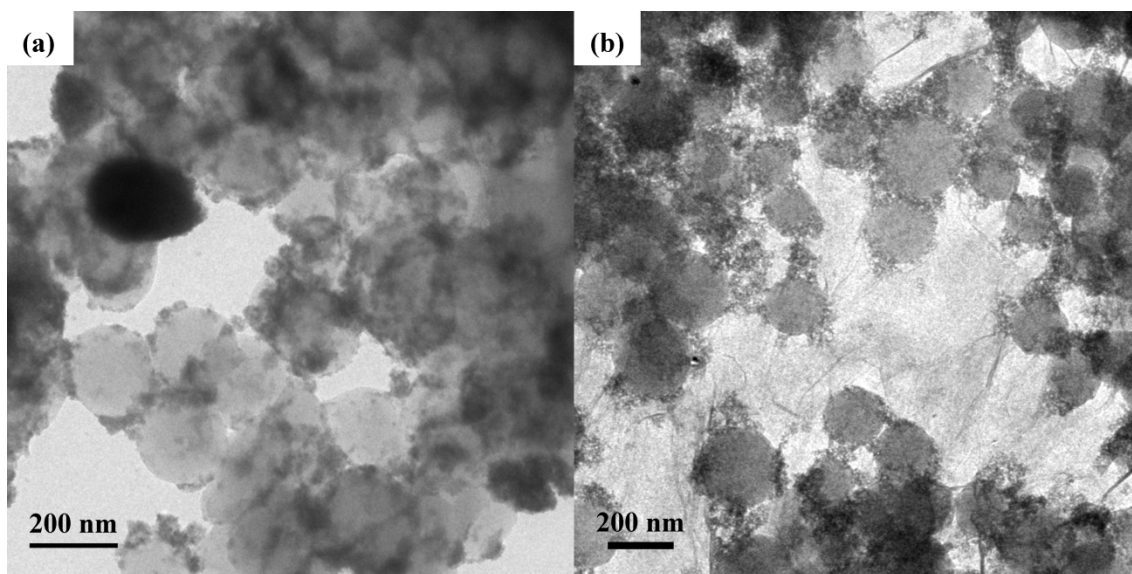

Fig. S3. TEM image of (a) PS@SnO<sub>2</sub> and (b) PS@SnO<sub>2</sub>@GO.

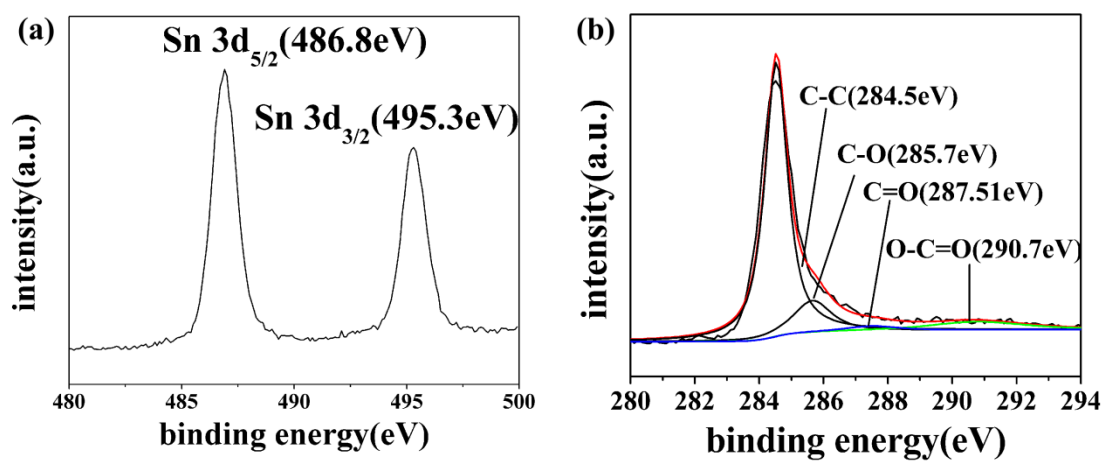

Fig. S4 Sn 3d (a) and C 1s (b) XPS spectra of 3D SnO<sub>2</sub>/GFs.

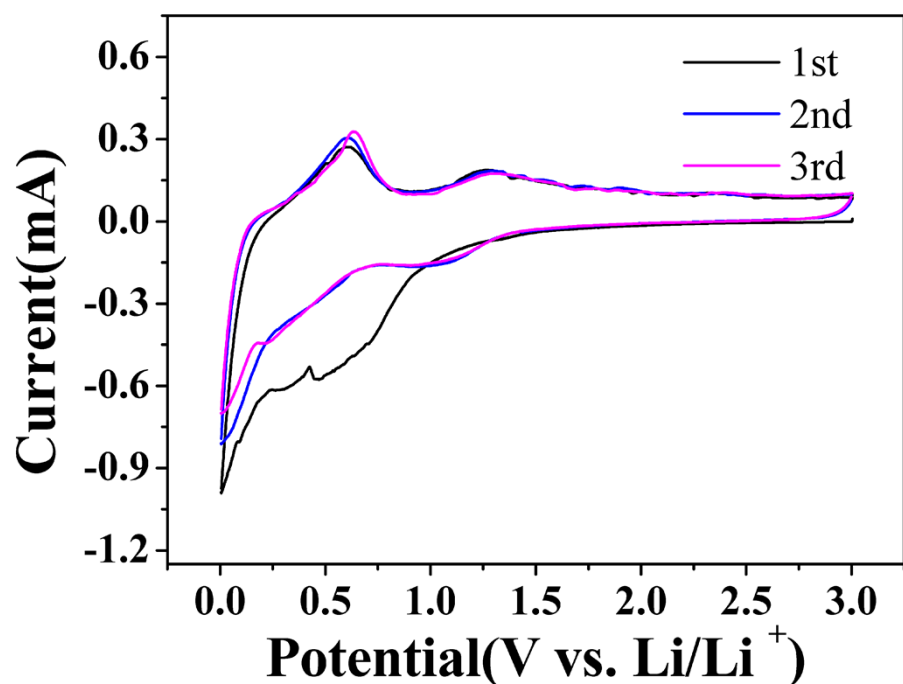

ode.

| Sample                                 | Capacity [ $\text{mAh g}^{-1}$ ] | Current density [ $\text{mA g}^{-1}$ ] |
|----------------------------------------|----------------------------------|----------------------------------------|
| Graphene-based $\text{SnO}_2$ (Ref 30) | 848 after 50 cycles              | 78                                     |
| $\text{SnO}_2$ /GNS (Ref 33)           | 570 after 30 cycles              | 50                                     |
| 3D $\text{SnO}_2$ /GFs (Ref 33)        | 830 after 70 cycles              | 100                                    |
| Graphene-based $\text{SnO}_2$ (Ref 37) | 558 after 50 cycles              | 264                                    |
| $\text{SnO}_2$ /RGO (this work)        | 670 after 100 cycles             | 100                                    |
| 3D $\text{SnO}_2$ /GFs (this work)     | 1244 after 50 cycles             | 100                                    |

**Table S1** Performance comparison of Graphene-based  $\text{SnO}_2$ , 3D  $\text{SnO}_2$ /GFs reported recently with  $\text{SnO}_2$ /RGO, 3D  $\text{SnO}_2$ /GFs in this work.

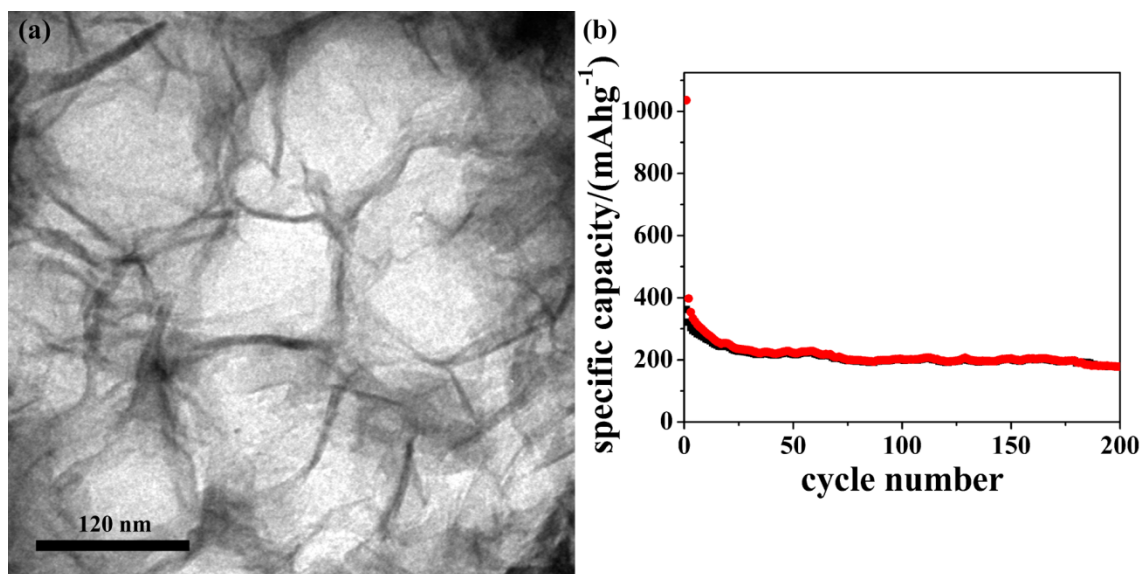

**Fig. S6** (a) TEM image of 3D GFs. (b) capacity retention of the 3D GFs electrode at a current density of  $1000 \text{ mAg}^{-1}$ .

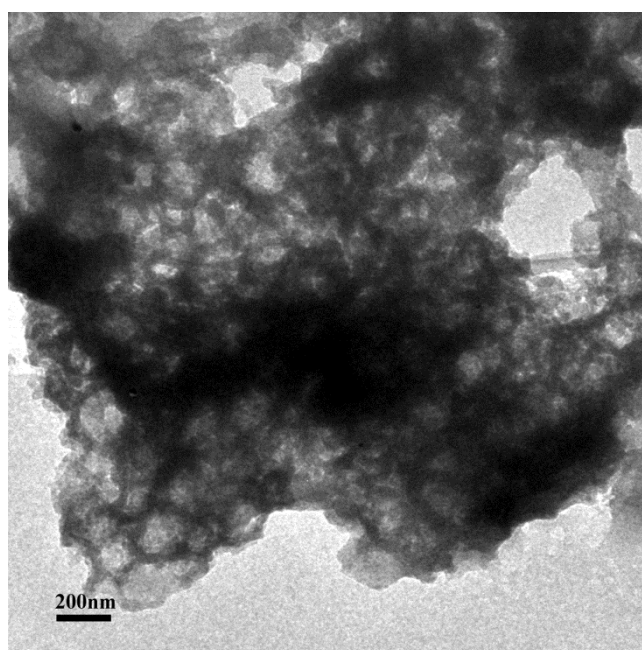

**Fig. S7** TEM image of a fully charged (3.0V) 3D  $\text{SnO}_2/\text{GFs}$  nanocomposite electrode after 50 cycles at a current density of  $100 \text{ mA}^{-1}$ .
